# Supplementary material for: Transcription Regulator YgeK Affects the Virulence of Avian Pathogenic Escherichia coli
Source: MDPI journal article supplement (doi:10.3390/ani11113018), 2021-10-20
Supplement: s1 [file s1]

Table S2. Primers used in this study.

| Primer Name         | Primer Sequence (5' -3')                                            |
|---------------------|---------------------------------------------------------------------|
| pKD46-f             | GATACCGTCCGTTCTTTCCTT                                               |
| pKD46-r             | TGATGATACCGCTGCCTTACT                                               |
| pKD3-ygeK-CM-f      | <u>TTGTAATATTTCTGACTCACGATTTGTAAGTTGATTATCAGAGGAATACCGTGTAGGC</u>   |
|                     | TGGAGCTGCTT                                                         |
| pKD3-ygeK-CM-r      | <u>GATGATGGGATAATTGGATTCTCTCGGACATTATCCTGATTTATATGAGGTCATATGAAT</u> |
|                     | ATCCTCCTTAGTTC                                                      |
| ygeK-out-f          | GGATAGCATAGGGAAGAACAGAG                                             |
| ygeK-out-r          | AATCCTTCTTGAAACCACCG                                                |
| ygeK-in-f           | TTCCATACGCATCCTTTC                                                  |
| ygeK-in-r           | TAGCGGAGTGTAACAAATCTG                                               |
| C-BamH I-ygeK-f     | <u>CGCGGATCCGATGGGAAAAATTAATAATTGT</u>                              |
| C-Hind III-ygeK-r   | <u>CCCAAGATTTTATATAGTGCACACACCCA</u>                                |
| Rt- <i>csgA</i> -f  | AGCGCTCTGGCAGGTGTTGT                                                |
| Rt- <i>csgA</i> -r  | GCCACGTTGGGTCAGATCGA                                                |
| Rt- <i>motA</i> - f | GGCAATAATGGCAAAGCGAT                                                |
| Rt- <i>motA</i> -r  | CAGCGAAAACATCCCCATCT                                                |
| Rt- <i>fliC</i> -f  | CCTGAACAACACCACTACCA                                                |
| Rt- <i>fliC</i> -r  | TGCTGGATAATCTGCGCTTT                                                |
| Rt- <i>fimA</i> -f  | TGCTGTCGGTTTTTAACATTC                                               |
| Rt- <i>fimA</i> -r  | ACCAACGTTTGTGCGCTAC                                                 |
| Rt-bcsA-f           | GATGGTACAAATCTTCCGTC                                                |
| Rt-bcsA-r           | ATCTTGAGTTGGTCAGGCT                                                 |
| Rt-wcaF-f           | TCTCGGTGCCGAAAGGGTTC                                                |
| Rt-wcaF-r           | ATTGACGTCATCGCCGACCC                                                |
| Rt-ompA-f           | GGTTTCAGGGTTGCTTTGTTG                                               |
| Rt-ompA-r           | GGTGTTTCCTACCGTTTCG                                                 |
| Rt-16s-f            | TTTGAGTTCCCGGCC                                                     |
| Rt-16s-r            | CGGCCGCAAGGTAA                                                      |
