# Supplementary material for: Transcription Regulator YgeK Affects the Virulence of Avian Pathogenic Escherichia coli
Source: Animals (Basel). 2021 Oct 20;11(11):3018. doi: 10.3390/ani11113018 (PMC8614350; doi:10.3390/ani11113018)
Supplement: Supplementary file 1 [file animals-11-03018-s001.zip]

Archive with 5 entries (5 files):
- animals-1261338-table S2.pdf
- Figure S1.jpg
- Figure S2.pdf
- Figure S3.pdf
- Table S1.xls
