# Supplementary material for: Transcription Regulator YgeK Affects the Virulence of Avian Pathogenic Escherichia coli
Source: Animals (Basel). 2021 Oct 20;11(11):3018. doi: 10.3390/ani11113018 (PMC8614350; doi:10.3390/ani11113018)
Supplement: Supplementary file 1 [file animals-11-03018-s001.zip › Table S1.xls]

geneID	Up-Down-Regulation(Ecs3712/AE81)	Symbol	KEGG Orthology
gene-ECs_5753	Up	-	K10986|1|4.1e-145|519.2|eck:EC55989_3560|PTS system, galactosamine-specific IID component
ECs_0657	Up	citC	K01910|1|1.2e-200|704.1|ecs:ECs0657|[citrate (pro-3S)-lyase] ligase [EC:6.2.1.22]
ECs_0653	Up	citX	K05964|1|4.8e-100|369.0|eso:O3O_06775|holo-ACP synthase [EC:2.7.7.61]
ECs_0652	Up	citG	K05966|1|6.4e-131|472.2|cbra:A6J81_10000|triphosphoribosyl-dephospho-CoA synthase [EC:2.4.2.52]
ECs_0654	Up	citF	K01643|1|3.0e-261|906.0|cro:ROD_06301|citrate lyase subunit alpha / citrate CoA-transferase [EC:2.8.3.10]
ECs_0655	Up	citE	K01644|1|7.8e-164|581.6|ecs:ECs0655|citrate lyase subunit beta / citryl-CoA lyase [EC:4.1.3.34]
ECs_0656	Up	citD	K01646|1|1.1e-47|194.1|elu:UM146_14425|citrate lyase subunit gamma (acyl carrier protein)
ECs_5296	Up	ECs_5296	-
ECs_0651	Up	citT	K09477|1|1.1e-271|940.6|sew:SeSA_A0777|citrate:succinate antiporter
ECs_3997	Up	tdcB	K01754|1|2.8e-159|566.6|buf:D8682_19410|threonine dehydratase [EC:4.3.1.19]
ECs_3038	Up	preT	K17722|1|8.0e-236|821.2|eok:G2583_2689|dihydropyrimidine dehydrogenase (NAD+) subunit PreT [EC:1.3.1.1]
ECs_2381	Up	ydhY	K07307|1|8.1e-19|99.4|dhd:Dhaf_0289|anaerobic dimethyl sulfoxide reductase subunit B (DMSO reductase iron- sulfur subunit);K04014|3|1.8e-18|98.2|sse:Ssed_0242|protein NrfC;K07311|4|4.0e-18|97.1|cfd:CFNIH1_12225|Tat-targeted selenate reductase subunit YnfG
ECs_3787	Up	scpA	K01847|1|0.0e+00|1332.0|cif:AL515_19120|methylmalonyl-CoA mutase [EC:5.4.99.2]
ECs_3703	Up	yqeH	K21963|1|7.4e-12|76.3|kok:KONIH1_06105|LuxR family transcriptional regulator, Mat/Ecp fimbriae transcriptional regulator
ECs_5230	Up	yjgL	-
ECs_3039	Up	preA	K17723|1|3.6e-244|849.0|ecd:ECDH10B_2304|dihydropyrimidine dehydrogenase (NAD+) subunit PreA [EC:1.3.1.1]
ECs_3995	Up	tdcD	K00932|1|1.6e-217|760.4|eal:EAKF1_ch2818|propionate kinase [EC:2.7.2.15]
ECs_2303	Up	ECs_2303	K06006|1|1.7e-06|57.4|sfg:AV650_04245|periplasmic protein CpxP/Spy
ECs_2380	Up	ydhV	K03738|1|3.0e-182|644.0|sfu:Sfum_1080|aldehyde:ferredoxin oxidoreductase [EC:1.2.7.5]
ECs_4395	Up	gadW	K21906|1|4.7e-135|485.7|edj:ECDH1ME8569_3394|AraC family transcriptional regulator, glutamate-dependent acid resistance regulator
ECs_2293	Up	ynfF_2	K07309|1|0.0e+00|1619.8|sbc:SbBS512_E1773|Tat-targeted selenate reductase subunit YnfE [EC:1.97.1.9]
ECs_5018	Up	malK	K10111|1|3.7e-208|729.2|ecj:JW3995|multiple sugar transport system ATP-binding protein [EC:3.6.3.-]
ECs_1728	Up	narU	K02575|1|1.7e-263|913.3|elc:i14_1514|MFS transporter, NNP family, nitrate/nitrite transporter
ECs_4039	Up	yhbU	K08303|1|8.2e-191|671.4|ebe:B21_02976|putative protease [EC:3.4.-.-]
ECs_4090	Up	yhcC	K07139|1|2.2e-174|616.7|cfar:CI104_02650|uncharacterized protein
ECs_4396	Up	gadX	K21905|1|1.9e-153|547.0|eok:G2583_4252|AraC family transcriptional regulator, glutamate-dependent acid resistance regulator
ECs_3584	Up	hypC	K04653|1|2.2e-45|186.4|eco:b2728|hydrogenase expression/formation protein HypC
ECs_3998	Up	tdcA	K07592|1|8.4e-153|545.0|sek:SSPA2908|LysR family transcriptional regulator, tdc operon transcriptional activator
ECs_3788	Up	argK	K07588|1|2.5e-171|606.7|eal:EAKF1_ch3077c|LAO/AO transport system kinase [EC:2.7.-.-]
ECs_3582	Up	hypA	K04651|1|8.7e-63|244.6|elx:CDCO157_3342|hydrogenase nickel incorporation protein HypA/HybF
ECs_3301	Up	yfeW	K21469|1|1.9e-251|873.2|ecol:LY180_12500|serine-type D-Ala-D-Ala carboxypeptidase [EC:3.4.16.4]
ECs_5017	Up	malE	K10108|1|1.5e-218|763.8|cko:CKO_03881|maltose/maltodextrin transport system substrate-binding protein
ECs_1729	Up	narG	K00370|1|0.0e+00|2501.5|ebf:D782_1906|nitrate reductase / nitrite oxidoreductase, alpha subunit [EC:1.7.5.1 1.7.99.-]
ECs_2378	Up	ydhX	K08353|1|3.9e-112|409.5|cro:ROD_13831|thiosulfate reductase electron transport protein
gene-ECs_5338	Up	-	-
ECs_3401	Up	csiE	K03483|1|9.4e-06|57.0|tte:TTE0598|mannitol operon transcriptional antiterminator;K02538|2|9.4e-06|57.0|lao:AOX59_17015|activator of the mannose operon, transcriptional antiterminator
ECs_4390	Up	hdeA	K19777|1|4.4e-56|222.2|ssn:SSON_3576|acid stress chaperone HdeA
ECs_4417	Up	bcsF	-
ECs_3631	Up	yqcE	K08194|1|8.2e-10|70.5|cbra:A6J81_17445|MFS transporter, ACS family, D-galactonate transporter
ECs_1270	Up	pgaA	K11935|1|0.0e+00|1656.0|ebr:ECB_01026|biofilm PGA synthesis protein PgaA
ECs_5215	Up	nrdD	K21636|1|0.0e+00|1458.4|elr:ECO55CA74_24300|ribonucleoside-triphosphate reductase (formate) [EC:1.1.98.6]
gene-ECs_1920	Up	-	K12942|1|2.4e-145|520.0|ece:Z2428|aminobenzoyl-glutamate transport protein
ECs_3583	Up	hypB	K04652|1|4.2e-167|592.4|elx:CDCO157_3343|hydrogenase nickel incorporation protein HypB
ECs_3996	Up	tdcC	K03838|1|8.9e-241|837.8|spq:SPAB_04046|threonine transporter
ECs_3299	Up	murQ	K07106|1|4.7e-137|492.7|cko:CKO_00359|N-acetylmuramic acid 6-phosphate etherase [EC:4.2.1.126]
ECs_3751	Up	ygfK	K12527|1|0.0e+00|1932.5|caf:AL524_07130|putative selenate reductase [EC:1.97.1.9]
ECs_0979	Up	dmsA	K07306|1|0.0e+00|1530.0|kpz:KPNIH27_08525|anaerobic dimethyl sulfoxide reductase subunit A [EC:1.8.5.3]
gene-ECs_5016	Up	-	K10109|1|3.6e-278|962.2|cko:CKO_03883|maltose/maltodextrin transport system permease protein
BGI_novel_C93	Up	-	-
ECs_2777	Up	ECs_2777	-
ECs_2379	Up	ydhW	-
ECs_3789	Up	scpB	K11264|1|3.5e-144|516.2|eoc:CE10_3355|methylmalonyl-CoA decarboxylase [EC:4.1.1.-]
ECs_5097	Up	adiC	K03759|1|1.7e-255|886.7|elf:LF82_0038|arginine:agmatine antiporter
ECs_4687	Up	viaA	-
ECs_4250	Up	feoA	K04758|1|1.1e-34|150.6|eoh:ECO103_4126|ferrous iron transport protein A
ECs_3790	Up	scpC	K22214|1|8.8e-258|894.4|kle:AO703_17405|propionyl-CoA:succinyl-CoA transferase [EC:2.8.3.-]
ECs_3943	Up	ttdR	K21742|1|3.7e-177|625.9|etw:ECSP_4033|LysR family transcriptional regulator, transcriptional activator for ttdABT operon
ECs_4466	Up	yiaY	K13954|1|1.2e-196|691.0|cyo:CD187_00760|alcohol dehydrogenase [EC:1.1.1.1]
ECs_4688	Up	ravA	K03924|1|3.5e-254|882.5|cko:CKO_00086|MoxR-like ATPase [EC:3.6.3.-]
ECs_4847	Up	yiiS	-
ECs_2391	Up	sufA	K05997|1|1.4e-66|257.3|elo:EC042_1851|Fe-S cluster assembly protein SufA
ECs_3300	Up	murP	K11191|1|6.1e-272|941.4|eok:G2583_2960|PTS system, N-acetylmuramic acid-specific IIB component [EC:2.7.1.192];K11192|1|6.1e-272|941.4|eok:G2583_2960|PTS system, N-acetylmuramic acid-specific IIC component
ECs_5298	Up	yjiM	K20026|1|1.2e-15|89.7|cbn:CbC4_0488|(R)-2-hydroxyisocaproyl-CoA dehydratase beta subunit [EC:4.2.1.157];K20904|2|1.5e-15|89.4|pmib:BB2000_2634|(R)-2-hydroxyglutaryl-CoA dehydratase subunit beta [EC:4.2.1.167];K04112|3|1.5e-15|89.4|aza:AZKH_2137|benzoyl-CoA reductase subunit C [EC:1.3.7.8]
ECs_3585	Up	hypD	K04654|1|1.1e-207|727.6|cif:AL515_18280|hydrogenase expression/formation protein HypD
ECs_3974	Up	uxaC	K01812|1|2.7e-264|916.0|eclc:ECR091_18890|glucuronate isomerase [EC:5.3.1.12]
ECs_4413	Up	bcsA	K00694|1|0.0e+00|1693.3|efe:EFER_3518|cellulose synthase (UDP-forming) [EC:2.4.1.12]
ECs_2377	Up	ydhU	K08354|1|9.1e-153|544.7|ece:Z2697|thiosulfate reductase cytochrome b subunit
ECs_2102	Up	ydeM	K06871|1|3.6e-230|802.4|ecs:ECs2102|uncharacterized protein
BGI_novel_C21	Up	-	K12678|1|2.1e-38|166.0|cwe:CO701_12860|autotransporter family porin
ECs_3621	Up	ygcN	K00313|1|1.2e-189|667.9|kqv:B8P98_05535|electron transfer flavoprotein-quinone oxidoreductase [EC:1.5.5.-]
ECs_4848	Up	uspD	K14065|1|2.2e-76|290.0|eci:UTI89_C4507|universal stress protein D
ECs_3560	Up	srlB	K02781|1|3.4e-65|252.7|etw:ECSP_3652|PTS system, glucitol/sorbitol-specific IIA component [EC:2.7.1.198]
ECs_0660	Up	dcuC	K03326|1|6.2e-237|825.1|laz:A8A57_06115|C4-dicarboxylate transporter, DcuC family
gene-ECs_4414	Up	-	K03496|1|5.2e-12|77.0|bxe:Bxe_B2039|chromosome partitioning protein
ECs_3623	Up	ygcP	K02443|1|4.1e-102|375.9|ecv:APECO1_3764|glycerol uptake operon antiterminator
BGI_novel_C64	Up	-	K02783|1|9.9e-71|271.9|ece:Z4005|PTS system, glucitol/sorbitol-specific IIC component
ECs_4259	Up	glgP	K00688|1|0.0e+00|1618.6|ese:ECSF_3239|glycogen phosphorylase [EC:2.4.1.1]
ECs_3794	Up	argO	K06895|1|1.9e-116|423.7|eoj:ECO26_4010|L-lysine exporter family protein LysE/ArgO
ECs_3748	Up	ECs_3748	K07402|1|9.6e-306|1053.9|elo:EC042_3086|xanthine dehydrogenase accessory factor
ECs_4418	Up	bcsG	-
ECs_4416	Up	bcsE	-
ECs_0890	Up	dps	K04047|1|1.1e-87|327.8|ebl:ECD_00779|starvation-inducible DNA-binding protein
ECs_4359	Up	rbbA	K13926|1|0.0e+00|1779.6|ecm:EcSMS35_3775|ribosome-dependent ATPase
ECs_3478	Up	recN	K03631|1|6.2e-292|1008.1|cir:C2U53_29425|DNA repair protein RecN (Recombination protein N)
ECs_3330	Up	aegA	K00266|1|8.7e-184|649.0|cen:LH86_02985|glutamate synthase (NADPH) small chain [EC:1.4.1.13]
ECs_3586	Up	hypE	K04655|1|8.9e-177|624.8|cif:AL515_18285|hydrogenase expression/formation protein HypE
ECs_2403	Up	ydiP	K07497|1|9.8e-66|255.8|sdy:SDY_1784|putative transposase;K02855|2|8.7e-14|83.2|ccb:Clocel_3110|AraC family transcriptional regulator, L-rhamnose operon regulatory protein RhaS;K02016|3|8.7e-14|83.2|pxl:BS614_22990|iron complex transport system substrate-binding protein;K07720|4|3.3e-13|81.3|paeq:R50912_04595|two-component system, response regulator YesN
ECs_5191	Up	cpdB	K01119|1|0.0e+00|1189.5|seeb:SEEB0189_020360|2',3'-cyclic-nucleotide 2'-phosphodiesterase / 3'-nucleotidase [EC:3.1.4.16 3.1.3.6]
ECs_5341	Up	deoA	K00758|1|3.5e-237|825.9|cama:F384_16095|thymidine phosphorylase [EC:2.4.2.4]
ECs_5297	Up	yjiL	K04114|1|6.2e-37|159.8|dgi:Desgi_1430|benzoyl-CoA reductase subunit A [EC:1.3.7.8]
ECs_5214	Up	nrdG	K04068|1|2.7e-88|329.7|ecf:ECH74115_5756|anaerobic ribonucleoside-triphosphate reductase activating protein [EC:1.97.1.4]
ECs_4377	Up	slp	K07285|1|1.6e-106|390.6|eoi:ECO111_4320|outer membrane lipoprotein
ECs_3752	Up	ssnA	K12960|1|1.5e-35|156.0|ppac:PAP_00255|5-methylthioadenosine/S-adenosylhomocysteine deaminase [EC:3.5.4.31 3.5.4.28]
ECs_4040	Up	yhbV	K08303|1|3.8e-06|57.8|mthe:MSTHC_1211|putative protease [EC:3.4.-.-]
ECs_3561	Up	srlD	K00068|1|3.2e-142|509.6|ecs:ECs3561|sorbitol-6-phosphate 2-dehydrogenase [EC:1.1.1.140]
ECs_3749	Up	yqeC	K07141|1|3.5e-16|90.9|pbf:CFX0092_A3171|molybdenum cofactor cytidylyltransferase [EC:2.7.7.76]
ECs_5101	Up	melA	K07406|1|9.3e-254|880.9|kgo:CEW81_14790|alpha-galactosidase [EC:3.2.1.22]
ECs_0980	Up	dmsB	K07311|1|8.0e-120|434.9|eal:EAKF1_ch4464c|Tat-targeted selenate reductase subunit YnfG
ECs_0728	Up	ybfA	-
ECs_4391	Up	hdeD	K21908|1|1.5e-99|367.5|esm:O3M_01380|membrane protein HdeD
ECs_0981	Up	dmsC	K07308|1|2.3e-149|533.5|cyo:CD187_15330|anaerobic dimethyl sulfoxide reductase subunit C (DMSO reductase anchor subunit)
ECs_4389	Up	hdeB	K19778|1|2.8e-58|229.6|ece:Z4921|acid stress chaperone HdeB
ECs_0640	Up	ybdM	-
ECs_3739	Up	xdhA	K00087|1|0.0e+00|1389.4|cama:F384_15820|xanthine dehydrogenase molybdenum-binding subunit [EC:1.17.1.4]
ECs_3587	Up	fhlA	K15836|1|0.0e+00|1247.3|cfar:CI104_19865|formate hydrogenlyase transcriptional activator
ECs_0037	Up	caiF	K08277|1|2.4e-69|266.5|elo:EC042_0036|transcriptional activator CaiF
ECs_2390	Up	sufB	K09014|1|8.0e-283|977.6|kqv:B8P98_11700|Fe-S cluster assembly protein SufB
ECs_1128	Up	hyaA	K06282|1|4.5e-222|775.4|ecf:ECH74115_1208|hydrogenase small subunit [EC:1.12.99.6]
ECs_2456	Up	ydjX	K01115|1|3.9e-09|67.4|reh:H16_B0932|phospholipase D1/2 [EC:3.1.4.4]
ECs_0433	Up	phoA	K01077|1|4.5e-243|845.5|eau:DI57_13945|alkaline phosphatase [EC:3.1.3.1]
ECs_5019	Up	lamB	K02024|1|4.4e-272|941.8|etw:ECSP_5114|maltoporin
ECs_2008	Up	ydbC	K05275|1|4.6e-158|562.4|ecf:ECH74115_2008|pyridoxine 4-dehydrogenase [EC:1.1.1.65]
ECs_2429	Up	pfkB	K16370|1|2.8e-148|530.0|ksa:C813_04950|6-phosphofructokinase 2 [EC:2.7.1.11]
ECs_4874	Up	gldA	K00005|1|4.8e-192|675.6|sed:SeD_A4514|glycerol dehydrogenase [EC:1.1.1.6]
ECs_4412	Up	bcsB	K20541|1|0.0e+00|1359.4|caf:AL524_01905|cellulose synthase operon protein B
ECs_5337	Up	yjjW	K04069|1|3.1e-85|320.5|pds:CAY62_07270|pyruvate formate lyase activating enzyme [EC:1.97.1.4]
ECs_3743	Up	ygeW	K09065|1|8.9e-51|206.5|mta:Moth_1996|N-acetylornithine carbamoyltransferase [EC:2.1.3.9]
gene-ECs_3559	Up	-	K02782|1|6.1e-161|572.8|elr:ECO55CA74_15950|PTS system, glucitol/sorbitol-specific IIB component [EC:2.7.1.198];K02783|1|6.1e-161|572.8|elr:ECO55CA74_15950|PTS system, glucitol/sorbitol-specific IIC component
ECs_2031	Up	ydcH	K09794|1|6.4e-35|151.4|ecs:ECs2031|uncharacterized protein
ECs_0568	Up	gcl	K01608|1|0.0e+00|1136.7|cbra:A6J81_10600|tartronate-semialdehyde synthase [EC:4.1.1.47]
ECs_2509	Up	dmlA	K07246|1|4.9e-213|745.3|elx:CDCO157_2343|tartrate dehydrogenase/decarboxylase / D-malate dehydrogenase [EC:1.1.1.93 4.1.1.73 1.1.1.83]
ECs_2494	Up	yeaI	K02488|1|5.8e-22|110.9|rrp:RPK_01795|two-component system, cell cycle response regulator [EC:2.7.7.65]
ECs_2045	Up	ydcT	K02052|1|1.6e-170|604.0|caf:AL524_14875|putative spermidine/putrescine transport system ATP-binding protein
ECs_2113	Up	fmlA	K07345|1|9.6e-96|354.8|eko:EKO11_2312|major type 1 subunit fimbrin (pilin)
ECs_4258	Up	malQ	K00705|1|0.0e+00|1310.4|cko:CKO_04837|4-alpha-glucanotransferase [EC:2.4.1.25]
ECs_1730	Up	narY	K00371|1|3.2e-311|1072.0|ebl:ECD_01203|nitrate reductase / nitrite oxidoreductase, beta subunit [EC:1.7.5.1 1.7.99.-]
ECs_0709	Up	nagE	K02802|1|0.0e+00|1263.8|eck:EC55989_0665|PTS system, N-acetylglucosamine-specific IIA component [EC:2.7.1.193];K02803|1|0.0e+00|1263.8|eck:EC55989_0665|PTS system, N-acetylglucosamine-specific IIB component [EC:2.7.1.193];K02804|1|0.0e+00|1263.8|eck:EC55989_0665|PTS system, N-acetylglucosamine-specific IIC component
ECs_5229	Up	tabA	K19334|1|2.9e-82|309.7|elh:ETEC_4598|biofilm protein TabA
ECs_4367	Up	uspA	K06149|1|1.5e-75|287.3|sbo:SBO_3493|universal stress protein A
ECs_2103	Up	ydeN	K01138|1|0.0e+00|1150.2|ecs:ECs2103|uncharacterized sulfatase [EC:3.1.6.-]
ECs_5340	Up	deoC	K01619|1|6.1e-141|505.4|eso:O3O_03740|deoxyribose-phosphate aldolase [EC:4.1.2.4]
ECs_4761	Up	udp	K00757|1|1.5e-131|474.2|ebf:D782_4322|uridine phosphorylase [EC:2.4.2.3]
ECs_2457	Up	ydjY	-
ECs_1155	Up	cbpA	K05516|1|6.2e-177|625.2|eok:G2583_1234|curved DNA-binding protein
ECs_4602	Up	adeD	K01486|1|0.0e+00|1130.5|efe:EFER_3962|adenine deaminase [EC:3.5.4.2]
BGI_novel_C65	Up	-	K02782|1|1.5e-127|460.7|ecol:LY180_13695|PTS system, glucitol/sorbitol-specific IIB component [EC:2.7.1.198];K02783|1|1.5e-127|460.7|ecol:LY180_13695|PTS system, glucitol/sorbitol-specific IIC component
ECs_2493	Up	yeaH	K09786|1|9.4e-248|860.9|elw:ECW_m1953|uncharacterized protein
ECs_1451	Down	flgB	K02387|1|5.1e-70|268.9|ece:Z1711|flagellar basal-body rod protein FlgB
BGI_novel_C75	Down	-	-
BGI_novel_C08	Down	-	K00656|1|6.4e-82|308.5|ece:Z1045|formate C-acetyltransferase [EC:2.3.1.54]
BGI_novel_C85	Down	-	K03496|1|3.6e-06|57.4|bxe:Bxe_B2039|chromosome partitioning protein
BGI_novel_C13	Down	-	K07347|1|5.2e-145|518.8|ece:Z1289|outer membrane usher protein
BGI_novel_C84	Down	-	K20543|1|0.0e+00|1630.9|cko:CKO_04973|cellulose synthase operon protein C
ECs_2662	Down	fliC	K02406|1|0.0e+00|1110.9|elx:CDCO157_2460|flagellin
ECs_2600	Down	motA	K02556|1|1.6e-150|537.3|cfar:CI104_15550|chemotaxis protein MotA
ECs_2661	Down	fliA	K02405|1|6.5e-129|465.3|ecl:EcolC_1717|RNA polymerase sigma factor for flagellar operon FliA
ECs_1460	Down	flgK	K02396|1|7.5e-282|974.5|eal:EAKF1_ch0347c|flagellar hook-associated protein 1 FlgK
ECs_2591	Down	cheZ	K03414|1|5.3e-114|415.6|ecs:ECs2591|chemotaxis protein CheZ
ECs_3279	Down	flxA	-
ECs_2592	Down	cheY	K03413|1|6.1e-65|251.9|elw:ECW_m2058|two-component system, chemotaxis family, chemotaxis protein CheY
BGI_novel_C20	Down	-	K21087|1|3.4e-107|392.9|eok:G2583_1457|flagellar brake protein
ECs_2599	Down	motB	K02557|1|1.4e-171|607.4|eso:O3O_15470|chemotaxis protein MotB
ECs_2596	Down	tsr_1	K05875|1|1.3e-278|963.8|ema:C1192_02470|methyl-accepting chemotaxis protein II, aspartate sensor receptor
ECs_2665	Down	fliT	K02423|1|5.0e-61|238.8|ecj:JW1911|flagellar protein FliT
ECs_2595	Down	tap	K05877|1|4.1e-232|809.3|cfar:CI104_15495|methyl-accepting chemotaxis protein IV, peptide sensor receptor
ECs_2597	Down	cheW	K03408|1|6.8e-85|318.5|eih:ECOK1_2005|purine-binding chemotaxis protein CheW
ECs_2598	Down	cheA	K03407|1|3.3e-300|1035.8|ebf:D782_1745|two-component system, chemotaxis family, sensor kinase CheA [EC:2.7.13.3]
ECs_2594	Down	cheR	K00575|1|4.1e-154|549.3|ema:C1192_02475|chemotaxis protein methyltransferase CheR [EC:2.1.1.80]
ECs_4405	Down	yhjH	K21086|1|4.6e-117|426.0|cko:CKO_04967|c-di-GMP phosphodiesterase [EC:3.1.4.52]
ECs_2663	Down	fliD	K02407|1|1.2e-251|874.0|ece:Z3014|flagellar hook-associated protein 2
ECs_2593	Down	cheB	K03412|1|2.1e-184|650.2|sty:STY2126|two-component system, chemotaxis family, protein-glutamate methylesterase/glutaminase [EC:3.1.1.61 3.5.1.44]
ECs_2664	Down	fliS	K02422|1|1.2e-66|257.7|ecf:ECH74115_2700|flagellar protein FliS
ECs_2448	Down	ves	K09975|1|1.5e-107|394.0|ecs:ECs2448|uncharacterized protein
ECs_1448	Down	flgN	K02399|1|4.2e-72|275.8|ece:Z1708|flagella synthesis protein FlgN
ECs_1461	Down	flgL	K02397|1|2.3e-150|537.0|efe:EFER_1845|flagellar hook-associated protein 3 FlgL
ECs_1449	Down	flgM	K02398|1|4.0e-45|185.7|ena:ECNA114_1129|negative regulator of flagellin synthesis FlgM
ECs_2590	Down	flhB	K02401|1|6.3e-203|711.8|eal:EAKF1_ch4158|flagellar biosynthetic protein FlhB
gene-ECs_5782	Down	-	K10985|1|1.3e-146|524.2|ebr:ECB_03006|PTS system, galactosamine-specific IIC component
ECs_2685	Down	fliN	K02417|1|3.3e-69|266.2|ecs:ECs2685|flagellar motor switch protein FliN/FliY
ECs_5315	Down	tsr	K05874|1|1.0e-278|964.1|ema:C1192_13225|methyl-accepting chemotaxis protein I, serine sensor receptor
gene-ECs_1691	Down	-	K21087|1|2.3e-108|396.7|eok:G2583_1457|flagellar brake protein
ECs_2686	Down	fliO	K02418|1|2.3e-58|229.9|elp:P12B_c1074|flagellar protein FliO/FliZ
ECs_2660	Down	fliZ	K02425|1|7.2e-104|381.7|etw:ECSP_2525|regulator of sigma S factor FliZ
ECs_1452	Down	flgC	K02388|1|3.0e-67|259.6|shq:A0259_09510|flagellar basal-body rod protein FlgC
ECs_2926	Down	yehK	-
ECs_4300	Down	ECs_4300	-
ECs_0241	Down	ydcC	-
ECs_5092	Down	yjcZ	-
ECs_2026	Down	trg	K05876|1|2.9e-262|909.4|ema:C1192_05285|methyl-accepting chemotaxis protein III, ribose and galactose sensor receptor
ECs_4335	Down	ECs_4335	-
ECs_3954	Down	aer	K03776|1|6.7e-253|878.2|efe:EFER_3024|aerotaxis receptor
ECs_4336	Down	ECs_4336	K07003|1|1.7e-21|110.2|fjo:Fjoh_1078|uncharacterized protein;K06994|5|1.1e-07|64.3|sacs:SUSAZ_00640|putative drug exporter of the RND superfamily
ECs_4334	Down	ECs_4334	K07107|1|3.7e-76|289.3|eld:i02_1086|acyl-CoA thioester hydrolase [EC:3.1.2.-]
ECs_5279	Down	fimH	K07350|1|1.0e-147|528.1|kpn:KPN_03293|minor fimbrial subunit
ECs_4324	Down	ECs_4324	-
ECs_4603	Down	uhpT	K07784|1|9.5e-254|880.9|ear:CCG32635|MFS transporter, OPA family, hexose phosphate transport protein UhpT
ECs_4338	Down	fabF	K00647|1|6.0e-193|678.7|cro:ROD_43281|3-oxoacyl-[acyl-carrier-protein] synthase I [EC:2.3.1.41]
ECs_5278	Down	fimG	K07349|1|1.5e-87|327.4|elw:ECW_m4676|minor fimbrial subunit
ECs_4339	Down	ECs_4339	-
ECs_4337	Down	ECs_4337	K01000|1|2.8e-13|80.9|vfi:VF_0856|phospho-N-acetylmuramoyl-pentapeptide-transferase [EC:2.7.8.13]
ECs_1455	Down	flgF	K02391|1|9.1e-134|481.5|ena:ECNA114_1134|flagellar basal-body rod protein FlgF
ECs_5277	Down	fimF	K07348|1|7.7e-95|351.7|elx:CDCO157_4962|minor fimbrial subunit
ECs_4925	Down	zraP	K07803|1|2.9e-76|289.7|sfn:SFy_5837|zinc resistance-associated protein
ECs_4340	Down	fabG	K00059|1|1.3e-121|441.0|ron:TE10_00835|3-oxoacyl-[acyl-carrier protein] reductase [EC:1.1.1.100]
ECs_4333	Down	ECs_4333	K00786|1|1.6e-42|179.5|azo:azo3917|glycosyltransferase [EC:2.4.-.-];K22907|3|1.2e-13|83.6|cceu:CBR64_02515|polyprenyl-phospho-N-acetylgalactosaminyl synthase
ECs_2588	Down	flhE	K03516|1|3.9e-67|259.2|ece:Z2931|flagellar protein FlhE
ECs_4325	Down	ECs_4325	K21460|1|2.0e-17|95.5|nbr:O3I_021170|L-tyrosine C(3)-methyltransferase [EC:2.1.1.304];K21192|2|1.7e-13|82.4|vma:VAB18032_24825|methyltransferase [EC:2.1.1.-];K21377|4|4.0e-10|71.2|saq:Sare_0232|3-hydroxy-5-methyl-1-naphthoate 3-O-methyltransferase [EC:2.1.1.302]
BGI_novel_C25	Down	-	K12942|1|3.4e-133|479.6|ebw:BWG_1170|aminobenzoyl-glutamate transport protein
ECs_4332	Down	ECs_4332	-
ECs_2589	Down	flhA_2	K02400|1|0.0e+00|1287.7|cko:CKO_01079|flagellar biosynthesis protein FlhA
ECs_1453	Down	flgD	K02389|1|3.0e-123|446.4|ecg:E2348C_1165|flagellar basal-body rod modification protein FlgD
ECs_1457	Down	flgH	K02393|1|8.2e-129|464.9|ecoa:APECO78_09360|flagellar L-ring protein precursor FlgH
ECs_5091	Down	crfC	-
ECs_5113	Down	cadA	K01582|1|0.0e+00|1316.2|hpar:AL518_09050|lysine decarboxylase [EC:4.1.1.18]
ECs_1454	Down	flgE	K02390|1|1.1e-226|790.8|ece:Z1714|flagellar hook protein FlgE
ECs_3146	Down	arnF	K12963|1|1.9e-66|256.9|ecol:LY180_11730|undecaprenyl phosphate-alpha-L-ara4N flippase subunit ArnF
BGI_novel_C76	Down	-	K10986|1|9.4e-161|572.4|ecv:APECO1_3287|PTS system, galactosamine-specific IID component
ECs_4018	Down	agaB	K10984|1|3.2e-84|316.2|eok:G2583_3862|PTS system, galactosamine-specific IIB component [EC:2.7.1.-]
ECs_3145	Down	arnT	K07264|1|0.0e+00|1134.4|ssn:SSON_2318|4-amino-4-deoxy-L-arabinose transferase [EC:2.4.2.43]
ECs_5486	Down	arnE	K12962|1|8.1e-58|228.0|elr:ECO55CA74_13850|undecaprenyl phosphate-alpha-L-ara4N flippase subunit ArnE
ECs_5276	Down	fimD	K07347|1|0.0e+00|1446.0|eae:EAE_02425|outer membrane usher protein
ECs_1456	Down	flgG	K02392|1|2.2e-130|470.3|spe:Spro_2965|flagellar basal-body rod protein FlgG
ECs_1137	Down	wzc	K16692|1|2.1e-303|1046.6|exf:BFV63_00585|tyrosine-protein kinase Etk/Wzc [EC:2.7.10.-]
ECs_5274	Down	fimI	K07351|1|2.2e-91|340.1|ece:Z5913|fimbrial protein
BGI_novel_C77	Down	-	K02080|1|4.8e-90|335.9|ece:Z4497|galactosamine-6-phosphate isomerase [EC:5.3.1.-]
ECs_4341	Down	fabF	K09458|1|1.4e-221|773.9|koe:A225_5475|3-oxoacyl-[acyl-carrier-protein] synthase II [EC:2.3.1.179]
ECs_1623	Down	ECs_1623	K14744|1|1.4e-79|300.8|elx:CDCO157_1556|prophage endopeptidase [EC:3.4.-.-]
ECs_4331	Down	ECs_4331	K01897|1|9.7e-09|67.0|cmi:CMM_1414|long-chain acyl-CoA synthetase [EC:6.2.1.3];K03367|2|1.1e-07|63.5|ols:Olsu_1215|D-alanine--poly(phosphoribitol) ligase subunit 1 [EC:6.1.1.13];K12429|5|9.1e-07|60.5|afs:AFR_27990|fatty acid CoA ligase FadD36
ECs_3140	Down	ais	-
ECs_5275	Down	fimC	K07346|1|4.1e-131|472.6|ece:Z5914|fimbrial chaperone protein
ECs_5273	Down	fimA	K07345|1|2.0e-93|347.1|ecs:ECs5273|major type 1 subunit fimbrin (pilin)
ECs_4330	Down	ECs_4330	-
ECs_5114	Down	cadB	K03757|1|4.0e-241|839.0|kpz:KPNIH27_06095|cadaverine:lysine antiporter
ECs_2342	Down	nth	K10773|1|1.0e-117|427.9|elx:CDCO157_2175|endonuclease III [EC:4.2.99.18]
ECs_4016	Down	agaS	K02082|1|5.4e-194|682.2|cyo:CD187_02835|tagatose-6-phosphate ketose/aldose isomerase [EC:5.-.-.-]
ECs_0692	Down	gltK	K10002|1|1.3e-118|431.0|elc:i14_0706|glutamate/aspartate transport system permease protein
ECs_4017	Down	kbaY	K08302|1|1.1e-148|531.2|caf:AL524_23715|tagatose 1,6-diphosphate aldolase GatY/KbaY [EC:4.1.2.40]
ECs_0693	Down	gltJ	K10003|1|6.0e-138|495.4|ece:Z0804|glutamate/aspartate transport system permease protein
ECs_3539	Down	nrdF	K00526|1|8.8e-174|614.8|sdy:SDY_2869|ribonucleoside-diphosphate reductase beta chain [EC:1.17.4.1]
gene-ECs_2476	Down	-	K08369|1|1.6e-182|644.0|cfar:CI104_11685|MFS transporter, putative metabolite:H+ symporter
ECs_4328	Down	ECs_4328	K02078|1|6.5e-39|164.9|ecf:ECH74115_4800|acyl carrier protein
ECs_1877	Down	puuC	K09472|1|5.2e-274|948.3|eal:EAKF1_ch0118c|4-(gamma-glutamylamino)butanal dehydrogenase [EC:1.2.1.99]
ECs_3530	Down	stpA	K11685|1|1.2e-68|264.2|sdy:SDY_2859|DNA-binding protein StpA
ECs_0790	Down	acrZ	-
ECs_3141	Down	arnB	K07806|1|2.6e-212|743.0|ecl:EcolC_1396|UDP-4-amino-4-deoxy-L-arabinose-oxoglutarate aminotransferase [EC:2.6.1.87]
ECs_2466	Down	ynjH	-
ECs_2682	Down	fliK	K02414|1|2.1e-206|723.4|ecs:ECs2682|flagellar hook-length control protein FliK
ECs_1459	Down	flgJ	K02395|1|5.1e-174|615.5|etw:ECSP_1382|flagellar protein FlgJ
ECs_1458	Down	flgI	K02394|1|1.1e-180|637.9|lax:APT61_14055|flagellar P-ring protein precursor FlgI
ECs_4326	Down	ECs_4326	-
ECs_4014	Down	ECs_4014	K02744|1|4.2e-75|285.8|ecol:LY180_16195|PTS system, N-acetylgalactosamine-specific IIA component [EC:2.7.1.-]
ECs_4329	Down	ECs_4329	K02078|1|7.0e-38|161.4|ece:Z4854|acyl carrier protein
ECs_2341	Down	rsxE	K03613|1|1.8e-123|447.2|eck:EC55989_1800|Na+-translocating ferredoxin:NAD+ oxidoreductase subunit E
ECs_2680	Down	fliI	K02412|1|1.8e-257|893.3|ecs:ECs2680|flagellum-specific ATP synthase [EC:3.6.3.50]
ECs_2683	Down	fliL	K02415|1|1.0e-79|301.2|sfe:SFxv_2218|flagellar FliL protein
ECs_2684	Down	fliM	K02416|1|3.5e-189|666.0|ecos:EC958_2211|flagellar motor switch protein FliM
ECs_4013	Down	ECs_4013	K02747|1|1.9e-135|487.3|ahd:AI20_15205|PTS system, N-acetylgalactosamine-specific IID component
ECs_5096	Down	eptA	K03760|1|1.3e-310|1070.1|ecq:ECED1_4848|lipid A ethanolaminephosphotransferase [EC:2.7.8.43]
ECs_4327	Down	ECs_4327	K02078|1|2.0e-17|95.1|efe:EFER_3453|acyl carrier protein;K00655|2|8.2e-11|73.2|tvr:TVD_00010|1-acyl-sn-glycerol-3-phosphate acyltransferase [EC:2.3.1.51]
ECs_1876	Down	puuR	K14056|1|3.2e-99|366.3|ece:Z2489|HTH-type transcriptional regulator, repressor for puuD
BGI_novel_C90	Down	-	K10109|1|4.1e-278|962.2|cko:CKO_03883|maltose/maltodextrin transport system permease protein
ECs_4010	Down	kbaZ	K16371|1|7.5e-221|771.5|cbra:A6J81_20240|D-tagatose-1,6-bisphosphate aldolase subunit GatZ/KbaZ
ECs_1450	Down	flgA	K02386|1|1.2e-86|324.7|cko:CKO_01987|flagella basal body P-ring formation protein FlgA
ECs_0628	Down	fepG	K02015|1|4.4e-176|622.5|ebd:ECBD_3066|iron complex transport system permease protein
ECs_0067	Down	araB	K00853|1|1.8e-310|1069.7|cama:F384_00325|L-ribulokinase [EC:2.7.1.16]
ECs_0627	Down	fepC	K02013|1|1.8e-151|540.4|ecf:ECH74115_0672|iron complex transport system ATP-binding protein [EC:3.6.3.34]
ECs_0691	Down	gltL	K10004|1|8.2e-132|474.9|elx:CDCO157_0676|glutamate/aspartate transport system ATP-binding protein [EC:7.4.2.1]
ECs_2815	Down	yeeE	K07112|1|1.1e-190|671.0|etw:ECSP_2764|uncharacterized protein
ECs_1217	Down	ECs_1217	-
ECs_1138	Down	etp	K01104|1|1.1e-78|297.7|eso:O3O_08865|protein-tyrosine phosphatase [EC:3.1.3.48]
ECs_4607	Down	ECs_4607	-
ECs_1875	Down	puuD	K09473|1|8.0e-130|468.4|cro:ROD_03571|gamma-glutamyl-gamma-aminobutyrate hydrolase [EC:3.5.1.94]
ECs_1873	Down	puuP	K14052|1|9.1e-265|917.5|ece:Z2492|putrescine importer
ECs_3040	Down	mglC	K10541|1|4.9e-183|645.6|etw:ECSP_3026|methyl-galactoside transport system permease protein
ECs_2080	Down	fdnI	K08350|1|2.5e-124|449.9|ebd:ECBD_2163|formate dehydrogenase-N, gamma subunit
ECs_1878	Down	puuB	K09471|1|3.4e-229|799.3|cro:ROD_03601|gamma-glutamylputrescine oxidase [EC:1.4.3.-]
ECs_2602	Down	flhD	K02403|1|1.9e-57|226.9|elx:CDCO157_2437|flagellar transcriptional activator FlhD
ECs_4012	Down	agaW	K02746|1|3.6e-141|506.1|eck:EC55989_3552|PTS system, N-acetylgalactosamine-specific IIC component
ECs_3258	Down	lpxP	K12974|1|6.7e-163|578.6|cif:AL515_16195|KDO2-lipid IV(A) palmitoleoyltransferase [EC:2.3.1.242]
ECs_3952	Down	yqjH	K07229|1|4.3e-147|525.8|elr:ECO55CA74_18080|ferric-chelate reductase (NADPH) [EC:1.16.1.9]
ECs_4408	Down	dctA	K11103|1|2.7e-226|789.6|cro:ROD_42791|aerobic C4-dicarboxylate transport protein
ECs_2340	Down	rsxG	K03612|1|1.4e-100|370.9|efe:EFER_1412|Na+-translocating ferredoxin:NAD+ oxidoreductase subunit G
ECs_4011	Down	agaV	K02745|1|3.5e-83|312.8|elx:CDCO157_3752|PTS system, N-acetylgalactosamine-specific IIB component [EC:2.7.1.-]
ECs_5351	Down	trpR	K03720|1|8.8e-48|194.5|sft:NCTC1_04806|TrpR family transcriptional regulator, trp operon repressor
ECs_1874	Down	puuA	K09470|1|3.4e-267|925.6|sfl:SF1302|gamma-glutamylputrescine synthase [EC:6.3.1.11]
