# Supplementary figures and images for: Transcription Regulator YgeK Affects the Virulence of Avian Pathogenic Escherichia coli
Source: MDPI journal article supplement (doi:10.3390/ani11113018), 2021-10-20

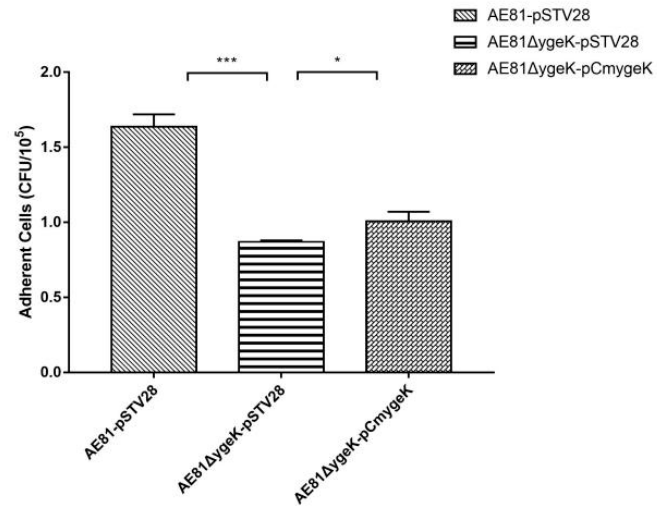

Figure S3. Bacterial adhesion assay with avian DF-1 of AE81-pSTV28, AE81ΔygeK-pSTV28 and AE81ΔygeK-pCmyeK.

Supplement: s1 [file s1]

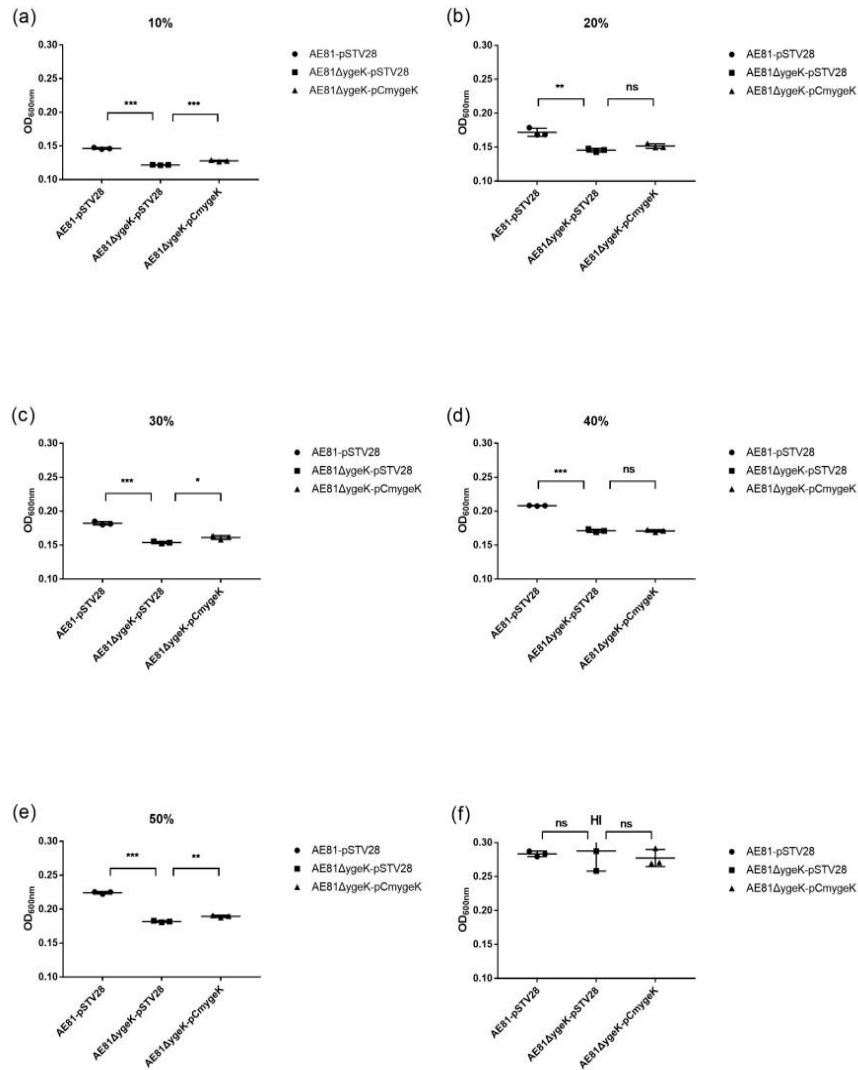

Figure S2. Bacterial resistance of AE81-pSTV28, AE81ΔygeK-pSTV28, and AE81ΔygeK-pCmycK to SPF chicken serum.

Supplement: s1 [file s1]
